# Supplementary material
Source: MDPI journal article supplement (https://www.mdpi.com/2305-7084/4/2/20)
Supplement: s1 [file s1]

Article

# Spectroscopic Studies of a Phosphonium Ionic Liquid in Supercritical CO<sub>2</sub>

Mark P. Heitz\*, Zackary C. Putney and Joel Campaign

Chemistry and Biochemistry Department, The College at Brockport, State University of New York, Brockport, New York, NY 14420, USA; [zputn1@brockport.edu](mailto:zputn1@brockport.edu)(Z.P.); [jcamp6@brockport.edu](mailto:jcamp6@brockport.edu)(J.C.)

\* Correspondence: [mheitz@brockport.edu](mailto:mheitz@brockport.edu); Tel.: +585-395-5586;

Received: 06 January 2020; Accepted: 20 March 2020; Published: date

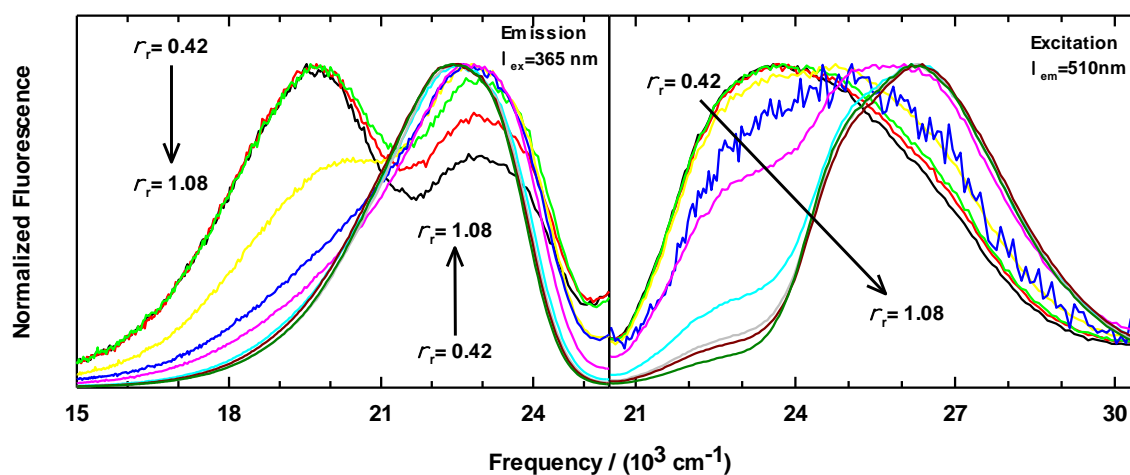

**Figure S1.** Steady-state excitation and emission spectra for C153 in [P<sub>6,6,6,14</sub>]<sup>+</sup> Tf<sub>2</sub>N<sup>-</sup>/scCO<sub>2</sub> at 323 K. Left panel: emission spectra with excitation at  $\nu_{\text{ex}} = 27,397 \text{ cm}^{-1}$ . Right panel: excitation spectra measured with emission at  $19608 \text{ cm}^{-1}$ . Spectral normalization was calculated using the more intense feature in each spectrum.

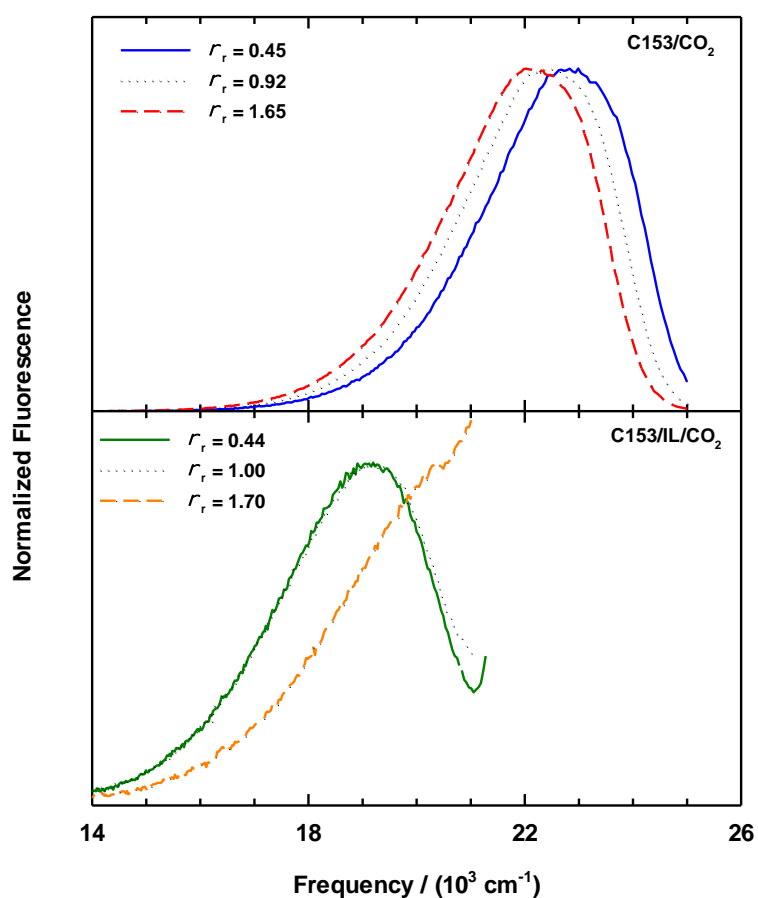

**Figure S2.** Normalized steady-state emission spectra for C153 in neat  $\text{scCO}_2$  (top, from Figure 2 for comparison) and in  $[\text{P}_{6,6,6,14}]^+ \text{Tf}_2\text{N}^-/\text{scCO}_2$  (bottom) measured at 323 K. Excitation for the IL spectra was at  $\nu_{\text{ex}} = 22,222 \text{ cm}^{-1}$ . These spectra show the clearly isolated, low energy emission when IL is present.

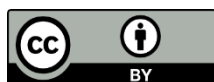

© 2019 by the authors. Submitted for possible open access publication under the terms and conditions of the Creative Commons Attribution (CC BY) license (<http://creativecommons.org/licenses/by/4.0/>).
